# Supplementary material for: Edible and medicinal mushrooms (Pleurotus ostreatus, Ustilago maydis, Ganoderma lucidum) reduce endoplasmic reticulum stress and inflammation in adipose tissue of obese Wistar rats fed with a high fat plus saccharose diet
Source: Royal Society of Chemistry journal article supplement (doi:10.1039/d3fo00089c), 2023-01-01

## Western Blot Raw Data

### Figure 5A

Adiponectin  
26-32 kDa

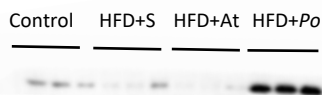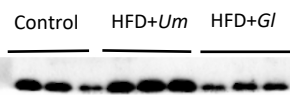

GAPDH  
37 kDa

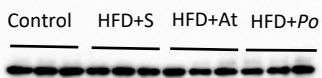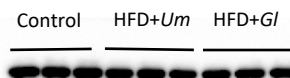

### Figure 5B

BIP  
78 kDa

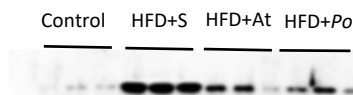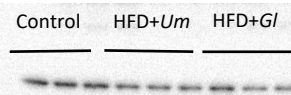

GAPDH  
37 kDa

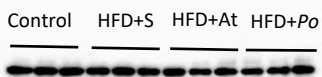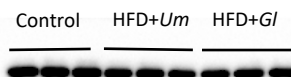

# Western Blot Raw Data

## Figure 5C

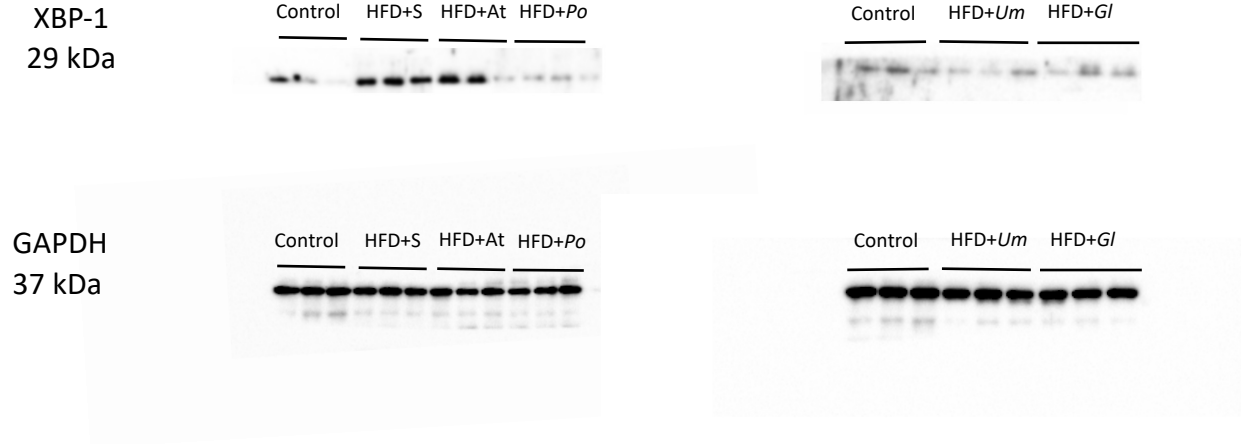

## Figure 5D

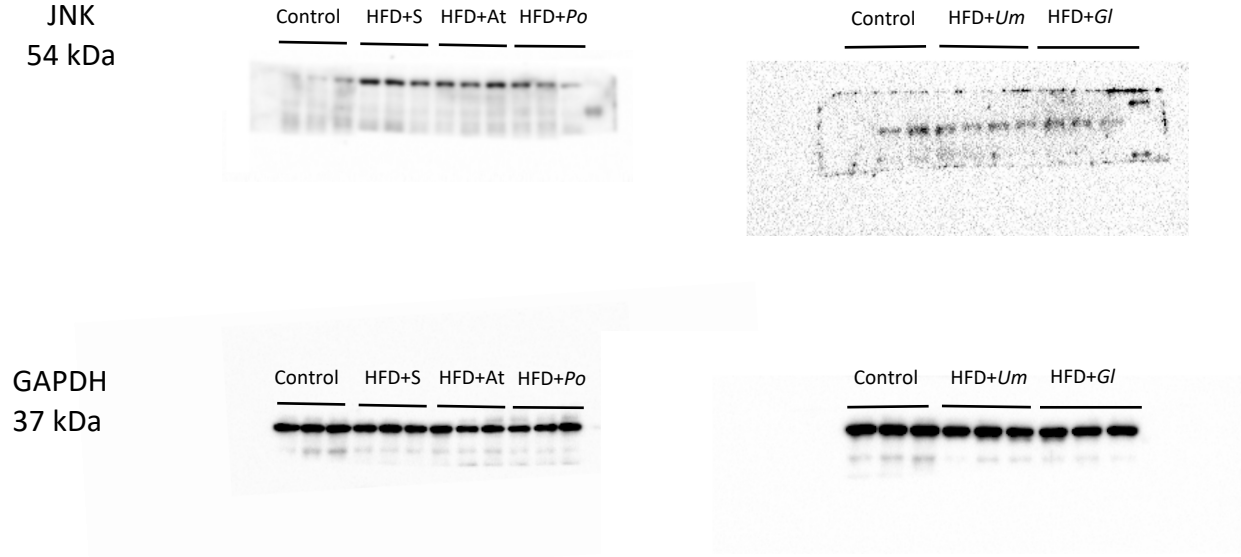

# Western Blot Raw Data

## Figure 5E

p-JNK  
40-50 kDa

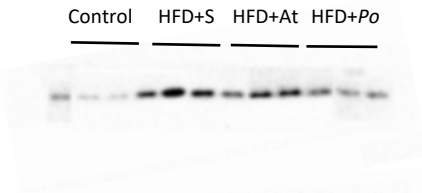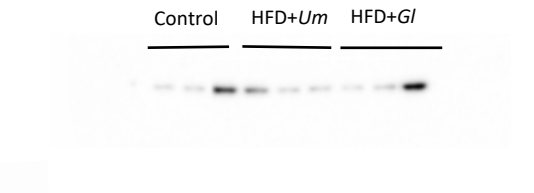

GAPDH  
37 kDa

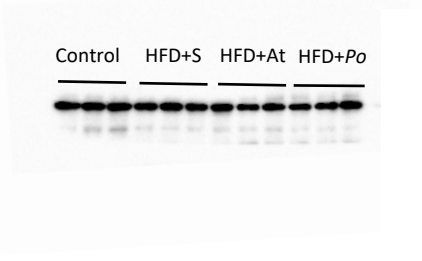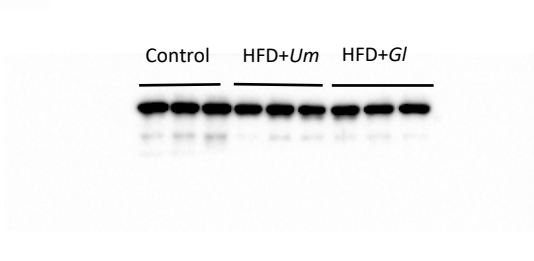

## Figure 5F

TNF- $\alpha$   
26 kDa

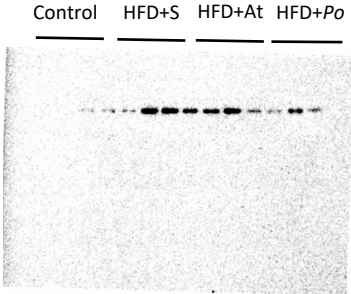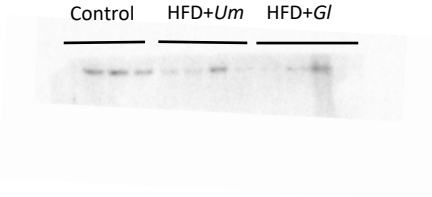

GAPDH  
37 kDa

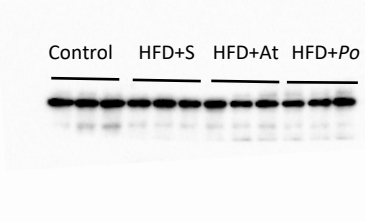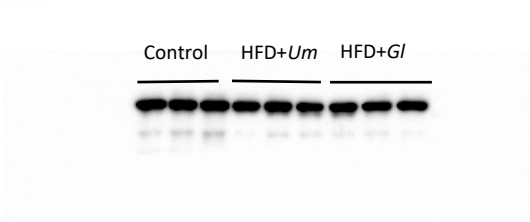

Supplement: d3fo00089c2.pdf [file d3fo00089c2.pdf]
